# Supplementary material
Source: publisher figshare collection journal article supplement (https://aacr.figshare.com/articles/dataset/_/23553153)
Supplement: Supplementary file 1 [file 41323662]

## Supplementary Table S1

| <u>Sample ID</u> | <u>Harvest Time</u> | <u>Barcode Time</u> | <u>Chemotherapy</u> | <u>Notes</u>    |
|------------------|---------------------|---------------------|---------------------|-----------------|
| HW1603           | 2 mo.               | 1 mo.               | -                   | -               |
| HW1604           | 3 mo.               | 1 mo.               | -                   | -               |
| HW1602           | 4 mo.               | 1 mo.               | -                   | -               |
| HW1656           | 4 mo.               | 2 mo.               | -                   | -               |
| HW1614           | 4 mo.               | 3 mo.               | -                   | -               |
| HW1641           | 5 mo.               | 0 mo.               | -                   | -               |
| HW1553           | 5 mo.               | 2 mo.               | -                   | -               |
| HW1640           | 5 mo.               | 3 mo.               | -                   | -               |
| HW1672           | 6 mo.               | 1 mo.               | cis/etop            | -               |
| HW1673           | 6 mo.               | 2 mo.               | -                   | harvest 5.5 mo. |
| HW1645           | 6 mo.               | 3 mo.               | -                   | harvest 5.5 mo. |
| HW1534           | 7 mo.               | 2 mo.               | cis/etop            | -               |
